# Supplementary material for: HAPLN1 confers multiple myeloma cell resistance to several classes of therapeutic drugs
Source: PubMed Central journal article supplement (PMC10045543; doi:10.1371/journal.pone.0274704), 2022-12-08

Fig 3A

12/20/17 mail67A IX9 19k

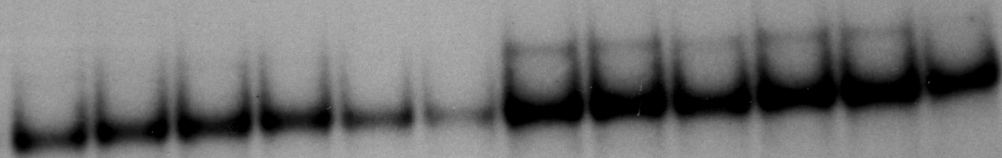

Fig 3A

12/20/17 mail167A 1X9

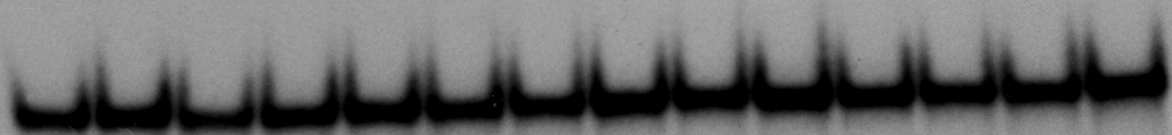



Fig 3C

12/20/17 mailb7A CARF

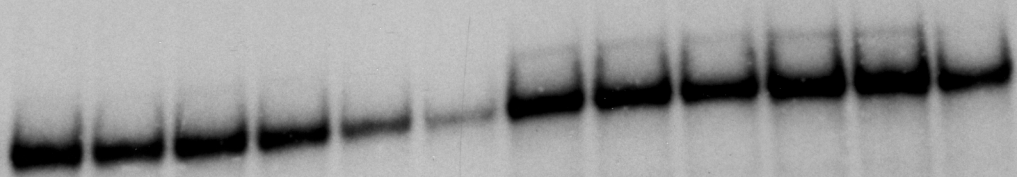

Fig 3C 12/20/17 mai167A CRF

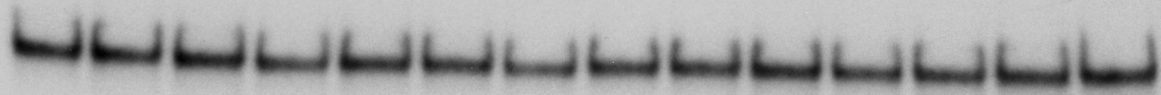

Fig 4A 04/11/17 Mail40F  $\alpha$ -IKB $\alpha$  (1:500) 2' (1:2000)

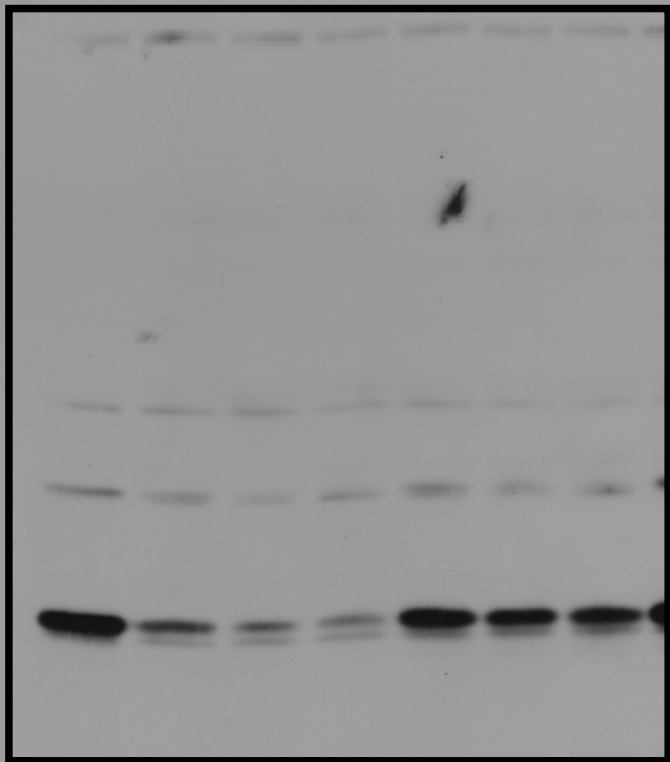

1m

3m

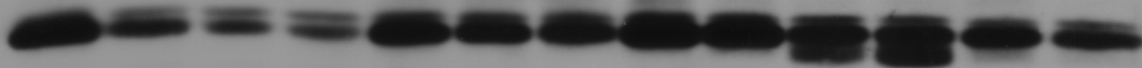

Fig 4A

04/10/17 ma1140F 2-1KBB(1:500) 2:(1:2000)

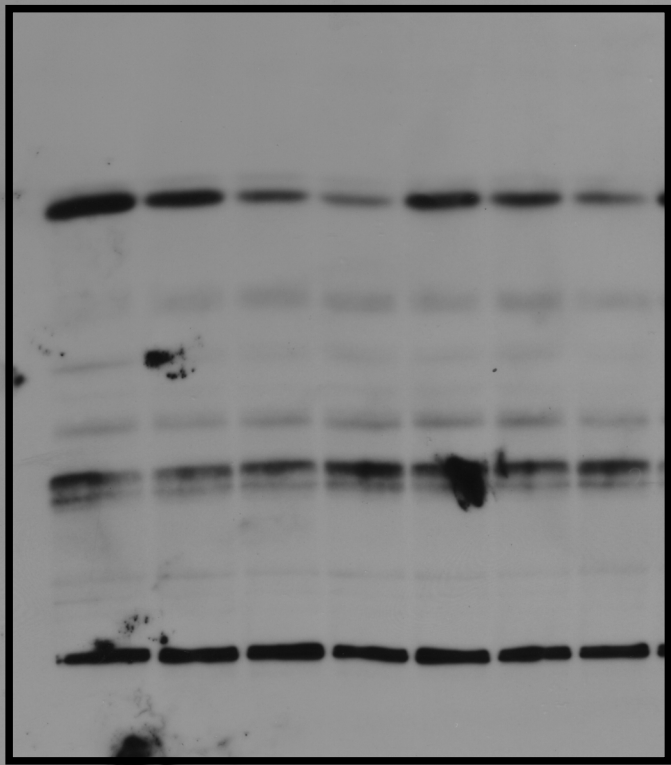

1M

3M

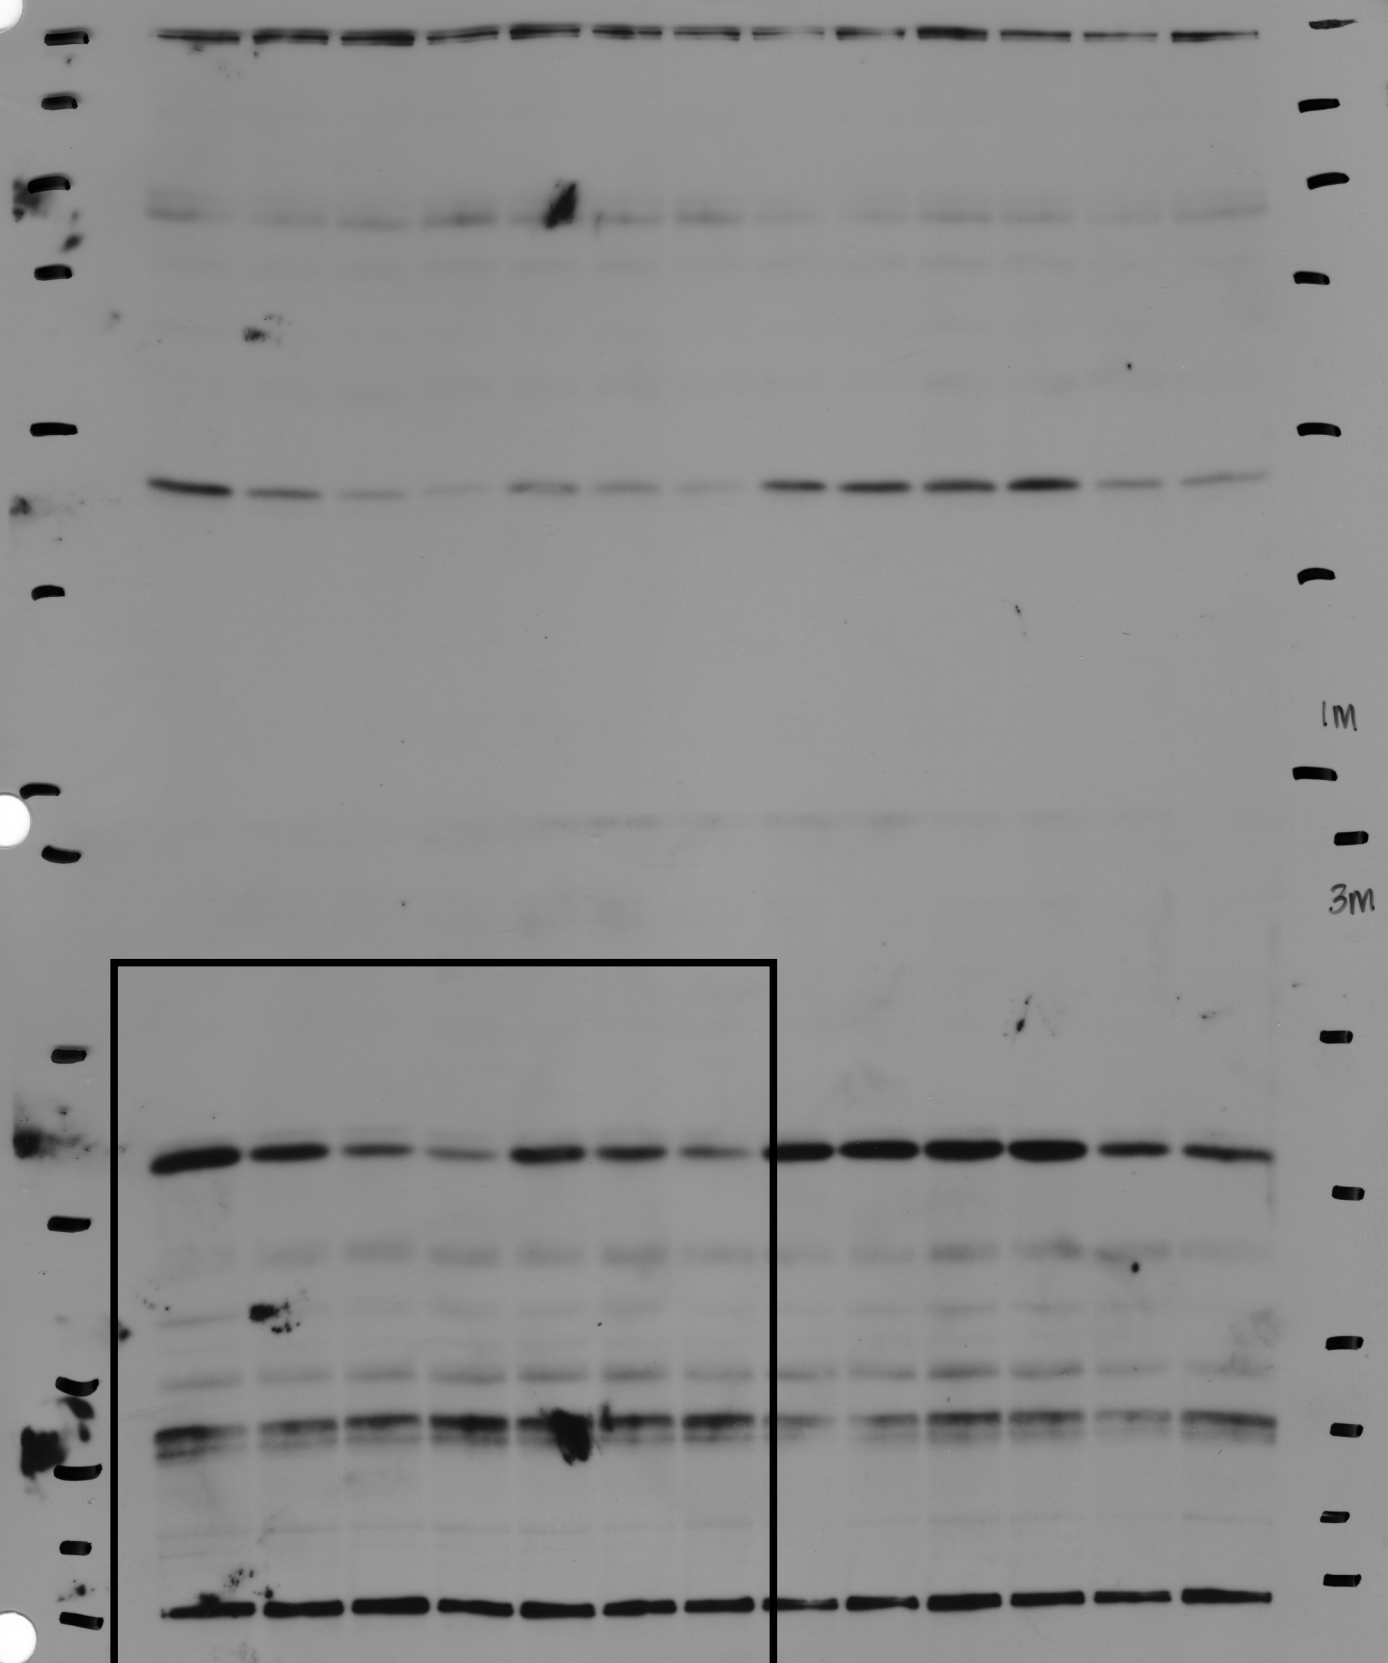



Fig 4A 04/12/17 mai140E  $\alpha$ -tubulin (1:1000) 2:(1:2000)

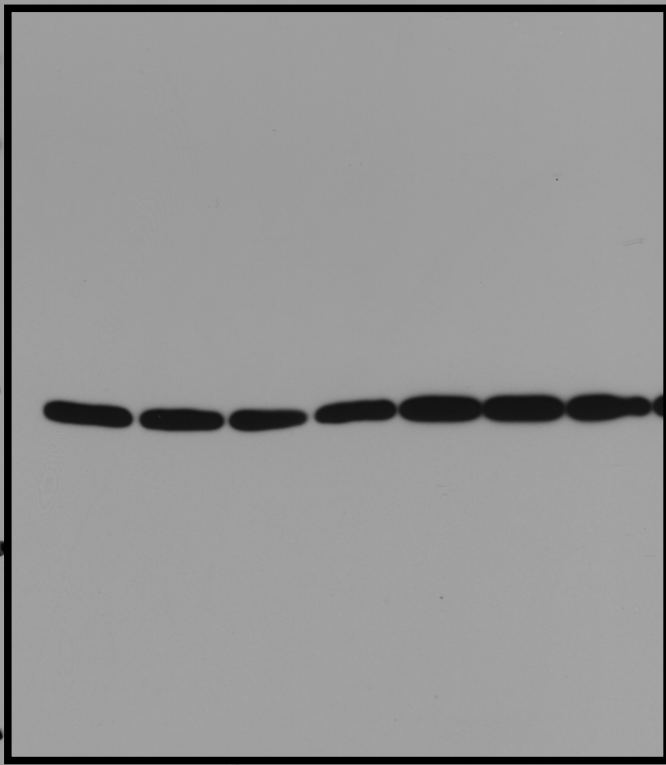

7m

15m

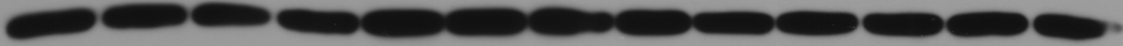



1 3 5 10 100nM GST-PTR1  
- 1 3 5 10 mM KPT-330

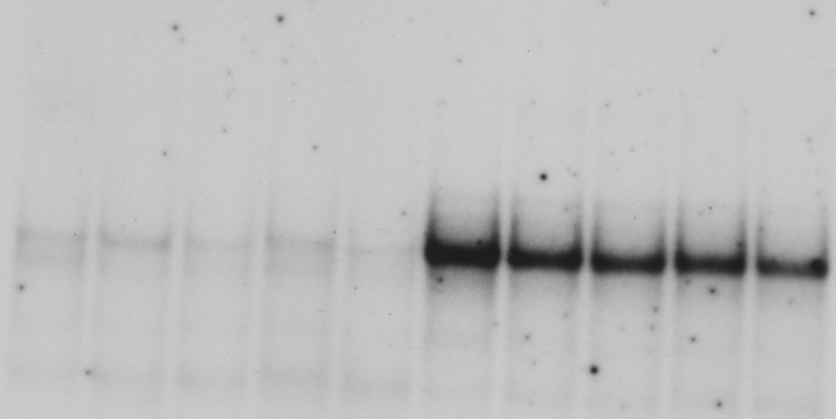

Fig 4C

03/09/17 mai144D oct-1

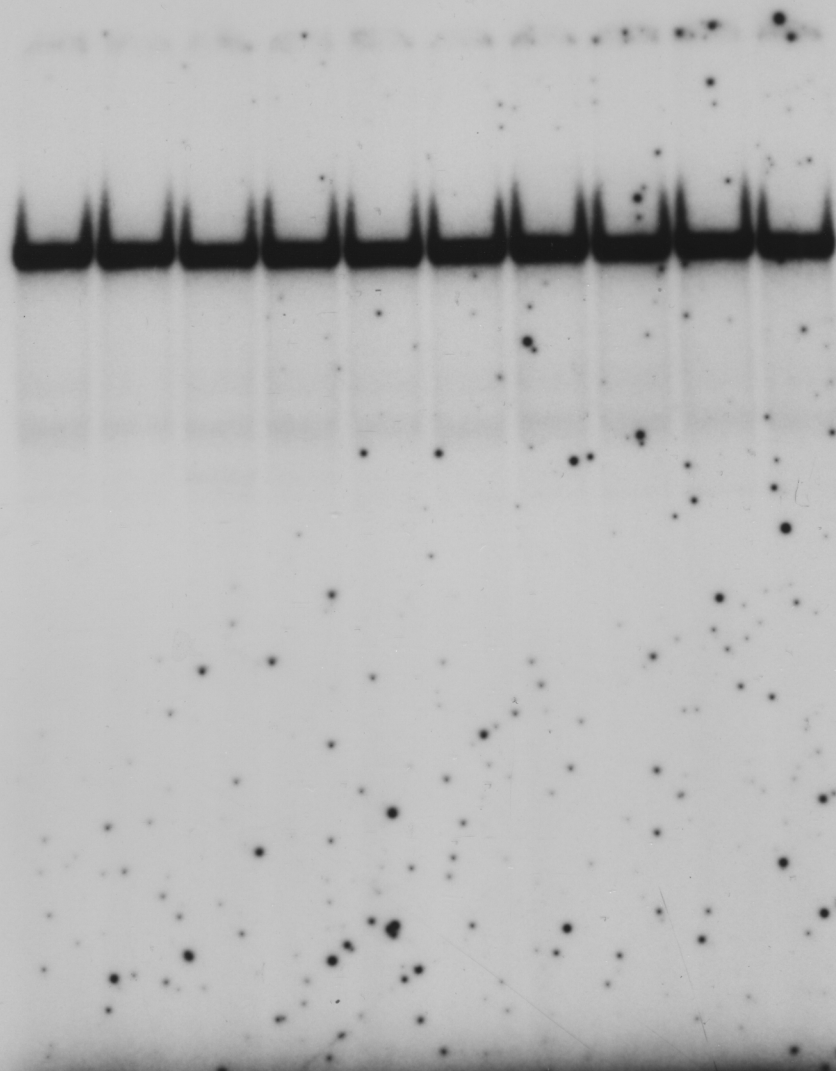

4hr

Fig 4D 03/14/17 M1140E Cx/B1K IgK

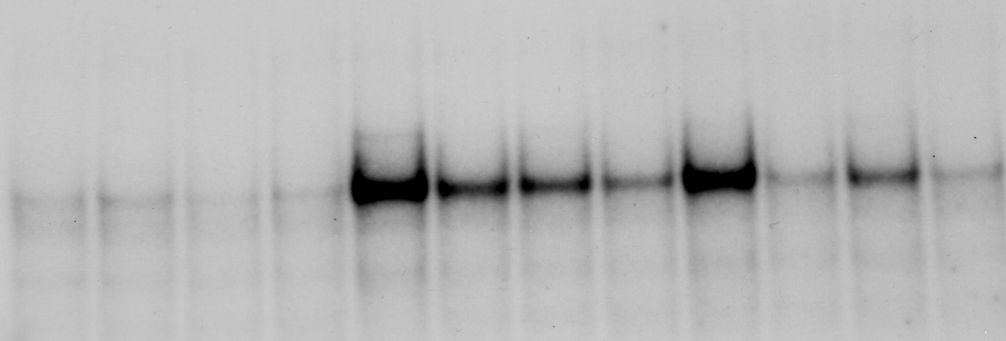

Fig 4D 03/13/17 mail44E ~~2~~ B07/KPT Oct 1

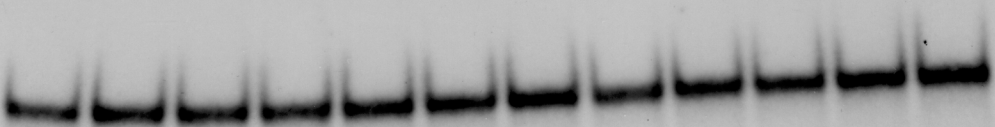

S1A Fig

12/20/17 maillo7A OPP0 IgK

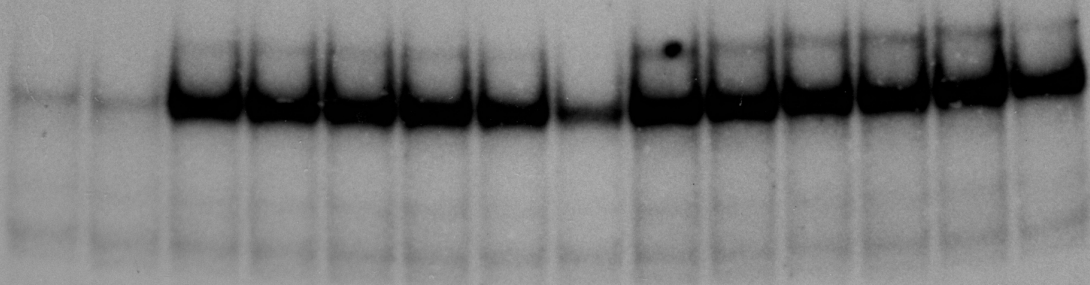



S1A Fig

12/20/17 mal167A OPFD oct

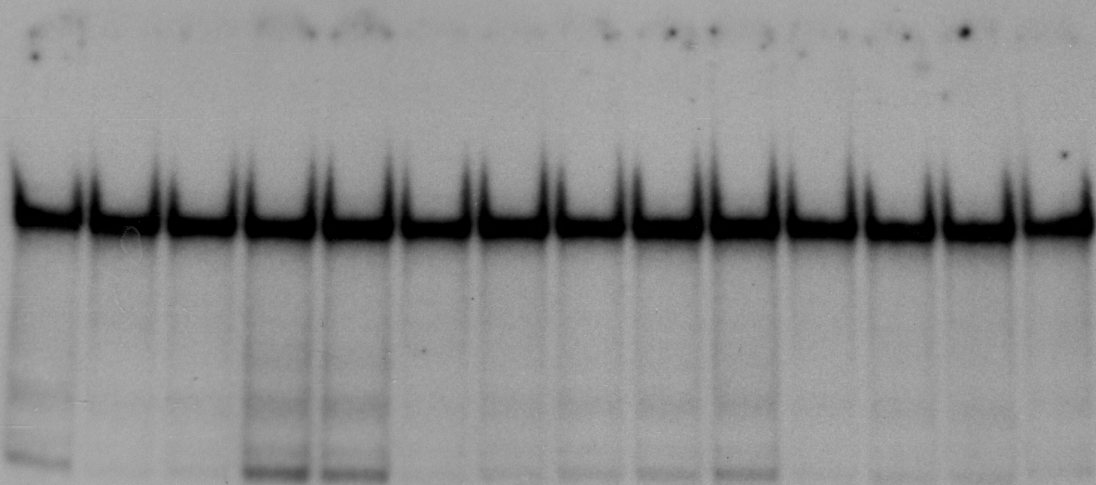

Supplement: pone.0274704.s003.pdf [file pone.0274704.s003.pdf]
